# Supplementary material for: A20 enhances migration and metastasis of gastric cancer cells by promoting occludin degradation
Source: Research Square preprint supplement (doi:10.21203/rs.3.rs-6780956/v1), 2025-09-29
Supplement: Supplementary file 1 [file 0bd25e94acc3e0b489a35a99.docx]

| **Supplementary Table S3. Primers for real-time PCR** | | |
| --- | --- | --- |
| **Gene name** | **Forward (5’-3’)** | **Reverse (5’-3’)** |
| A20 | GAGAGCACAATGGCTGAACA | TCCAGTGTGTATCGGTGCAT |
| N-cadherin | CATCATCATCCTGCTTATCCTTGT | GGTCTTCTTCTCCTCCACCTTCT |
| E-cadherin | TGCCCAGAAAATGAAAAAGG | GTGTATGTGGCAATGCGTTC |
| Vimentin | TACAGGAAGCTGCTGGAAGG | ACCAGAGGGAGTGAATCCAG |
| Occludin | CCACGCCGGTTCCTGAAGTGG | TCACAGGACTCGCCGCCAGT |
| Snail | AAGGATCTCCAGGCTCGAAAG | GCTTCGGATGTGCATCTTGA |
| Slug | TGGTTGCTTCAAGGACACAT | GTTGCAGTGAGGGCAAGAA |
| Twist1/2 | AAGGCATCACTATGGACTTTCTCT | GCCAGTTTGATCCCAGTATTTT |
| GAPDH | AATCCCATCACCATCTTCCA | TGGACTCCACGACGTACTCA |
