# Supplementary material for: A20 enhances migration and metastasis of gastric cancer cells by promoting occludin degradation
Source: Research Square preprint supplement (doi:10.21203/rs.3.rs-6780956/v1), 2025-09-29
Supplement: Supplementary file 6 [file 636953310db0294558e31b1a.docx]

| **Supplementary Table S2. Primers for Sanger sequencing of A20** | | |
| --- | --- | --- |
| **Clone name** | **Forward (5’-3’)** | **Reverse (5’-3’)** |
| C103A | GCCCTCATCGACAGAAACAT | GAACAGCGCCTTCCTCAGTA |
| C624A/C627A | GCTGCGTGTATTTTGGGACT | GTGGGACTGACTTTCCCTGA |
| F770A/G771A | CTGCATGGAGTGTCAGCATC | AAGCATTCGTTGCAGTAGCC |
|  |  |  |
