# Supplementary material for: A20 enhances migration and metastasis of gastric cancer cells by promoting occludin degradation
Source: Research Square preprint supplement (doi:10.21203/rs.3.rs-6780956/v1), 2025-09-29
Supplement: Supplementary file 7 [file 71ffbd7f9190342f63aab6ad.docx]

| **Supplementary Table S1. Primers for A20 mutagenesis** | | |
| --- | --- | --- |
| **Mutation site** | **Forward (5’-3’)** | **Reverse (5’-3’)** |
| C103A | AACGGTGACGGCAATGCCCTCATGCATGCCACT | AGTGGCATGCATGAGGGCATTGCCGTCACCGTT |
| C624A/C627A | TTTTCTCTGTACTCGATGAAAGCCAGTGTGGCAAAGCCCTTGTTTTCTGGAGTC | GACTCCAGAAAACAAGGGCTTTGCCACACTGGCTTTCATCGAGTACAGAGAAAA |
| F770A/G771A | CGTTGCACTTGGCATTGGCAGCATGATCACAGGCGGGGG | CCCCCGCCTGTGATCATGCTGCCAATGCCAAGTGCAACG |
|  |  |  |
