# Supplementary material for: A20 enhances migration and metastasis of gastric cancer cells by promoting occludin degradation
Source: Research Square preprint supplement (doi:10.21203/rs.3.rs-6780956/v1), 2025-09-29
Supplement: Supplementary file 9 [file 90d04a06107b7b1b4704c7ed.docx]

| **Supplementary Table S4. List of antibodies** | | |
| --- | --- | --- |
| A20 | GTX62211 | WB=1:1000 |
| N-cadherin | GTX127345 | WB=1:1000 |
| E-cadherin | GTX100443 | WB=1:1000 |
| Vimentin | GTX100619 | WB=1:1000 |
| Occludin | GTX114949 | WB=1:1000; IF=1:200 |
| Snail | GTX125918 | WB=1:1000 |
| Slug | GTX128796 | WB=1:1000 |
| Twist1/2 | GTX127310 | WB=1:1000 |
| RhoA | GTX01410 | WB=1:1000 |
| GAPDH | GTX627408 | WB=1:5000 |
| ROCK2 | GTX102619 | WB=1:1000 |
| p-ROCK2 (S1366) | GTX636103 | WB=1:1000 |
| ERK1/2 | GTX134462 | WB=1:2000 |
| p-ERK1/2 (T202/Y204/T185/Y187) | GTX635617 | WB=1:2000 |
| DDK | 14793S | IP=1 μg; PLA=1:200 |
| A20 | GTX11900 | IP=1 μg; IF=1:200 |
| RhoA | sc-418 | IP=1 μg; IF=1:100; PLA=1:100 |
| Occludin | 33-1500 | IF=1:200 |
| Goat Anti-Rabbit IgG (HRP) | GTX213110-01 | WB=1:5000 |
| Goat Anti-Mouse IgG (HRP) | GTX213111-01 | WB=1:5000 |
| Goat Anti-Rabbit IgG (DyLight488) | GTX213110-04 | IF=1:1000 |
| Goat Anti-Rabbit IgG (DyLight594) | GTX213111-05 | IF=1:1000 |
| Goat Anti-Mouse IgG (DyLight633) | GTX76787 | IF=1:1000 |
