# Supplementary figures and images for: A20 enhances migration and metastasis of gastric cancer cells by promoting occludin degradation
Source: Research Square preprint supplement (doi:10.21203/rs.3.rs-6780956/v1), 2025-09-29

Supplemental Figure 7.


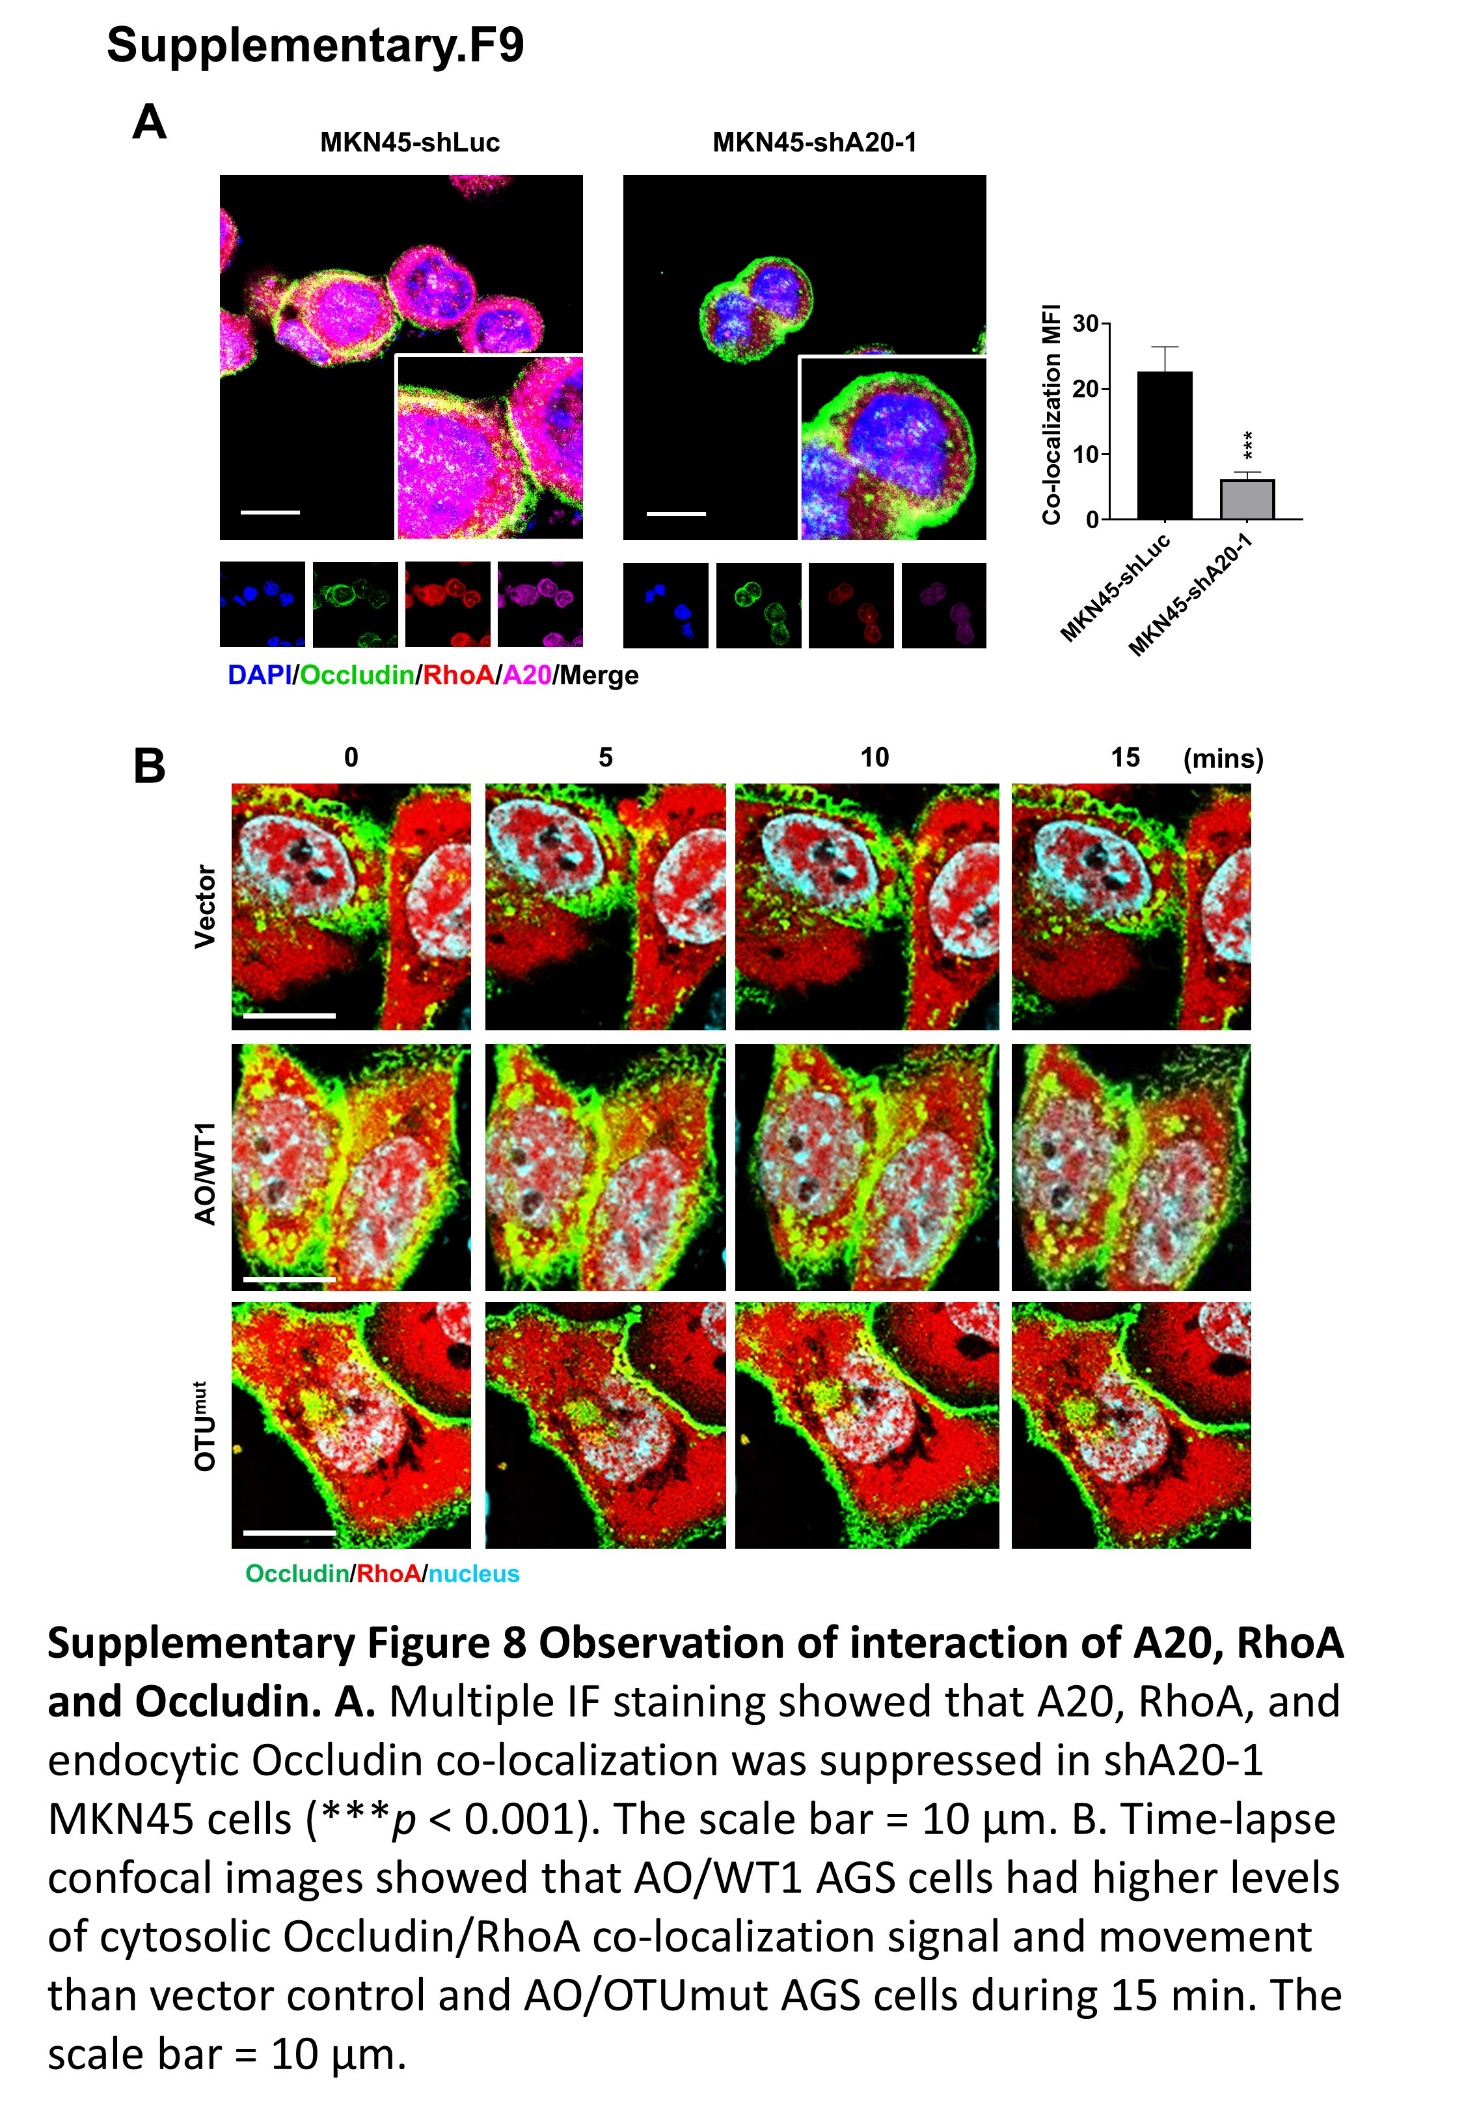

Supplement: Supplementary file 2 [file 0fced81b556f349b97ff5bcb.docx]

Supplemental Figure 5.

**
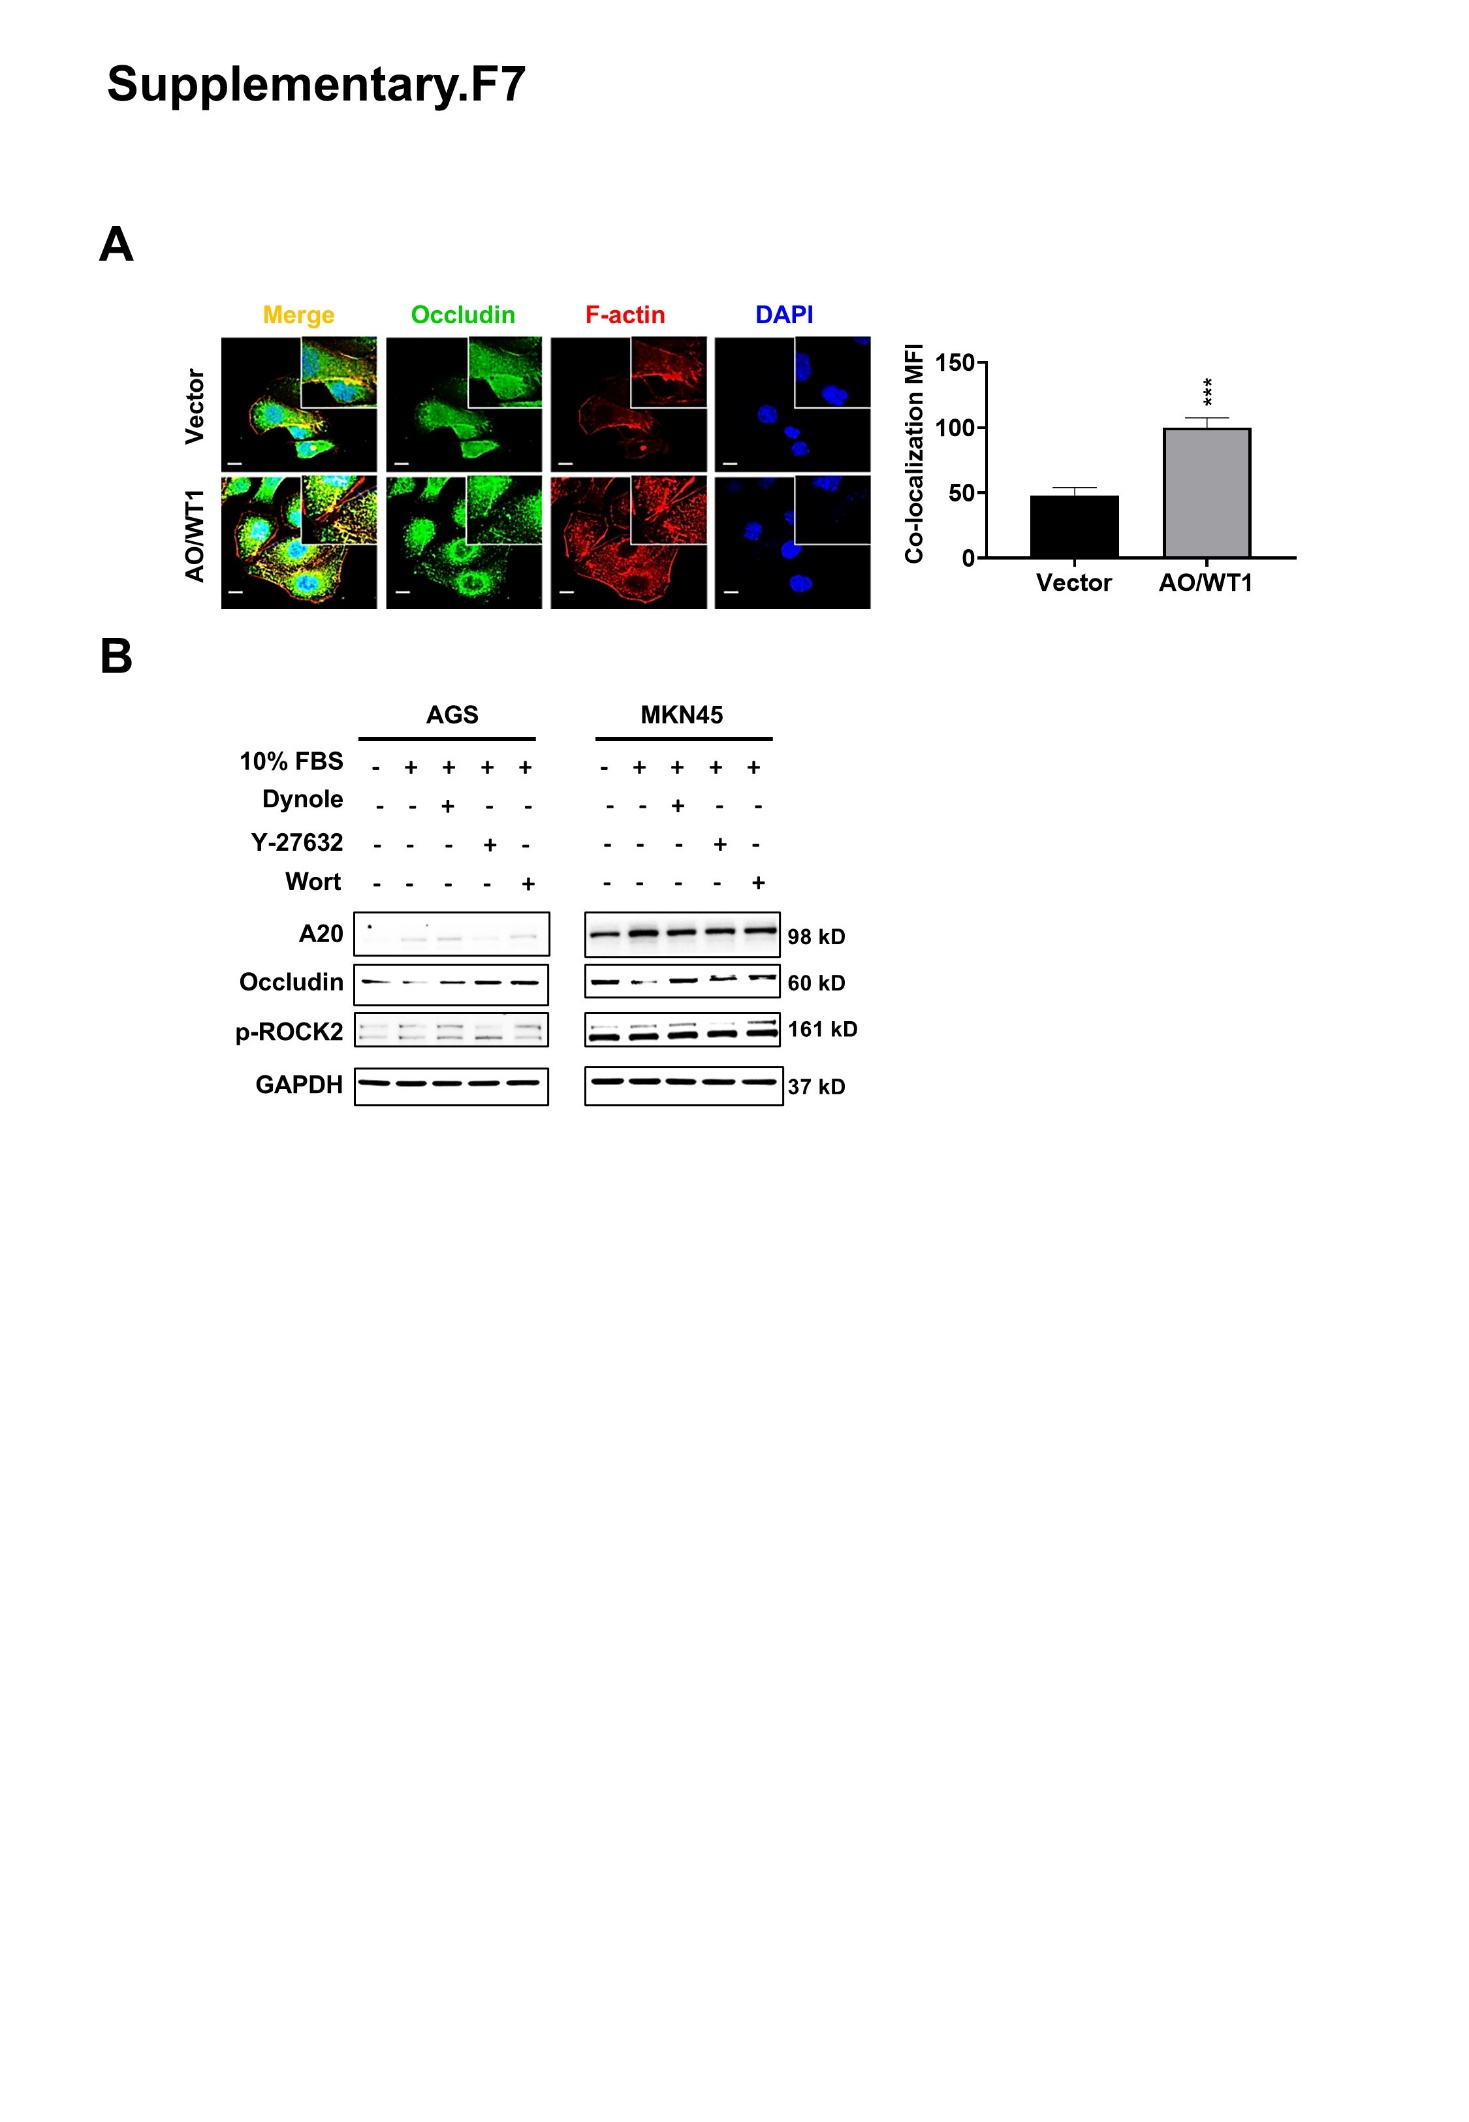
**

Supplement: Supplementary file 3 [file 1618c4974a9eb325f5f4c62e.docx]

Supplemental Figure 3.


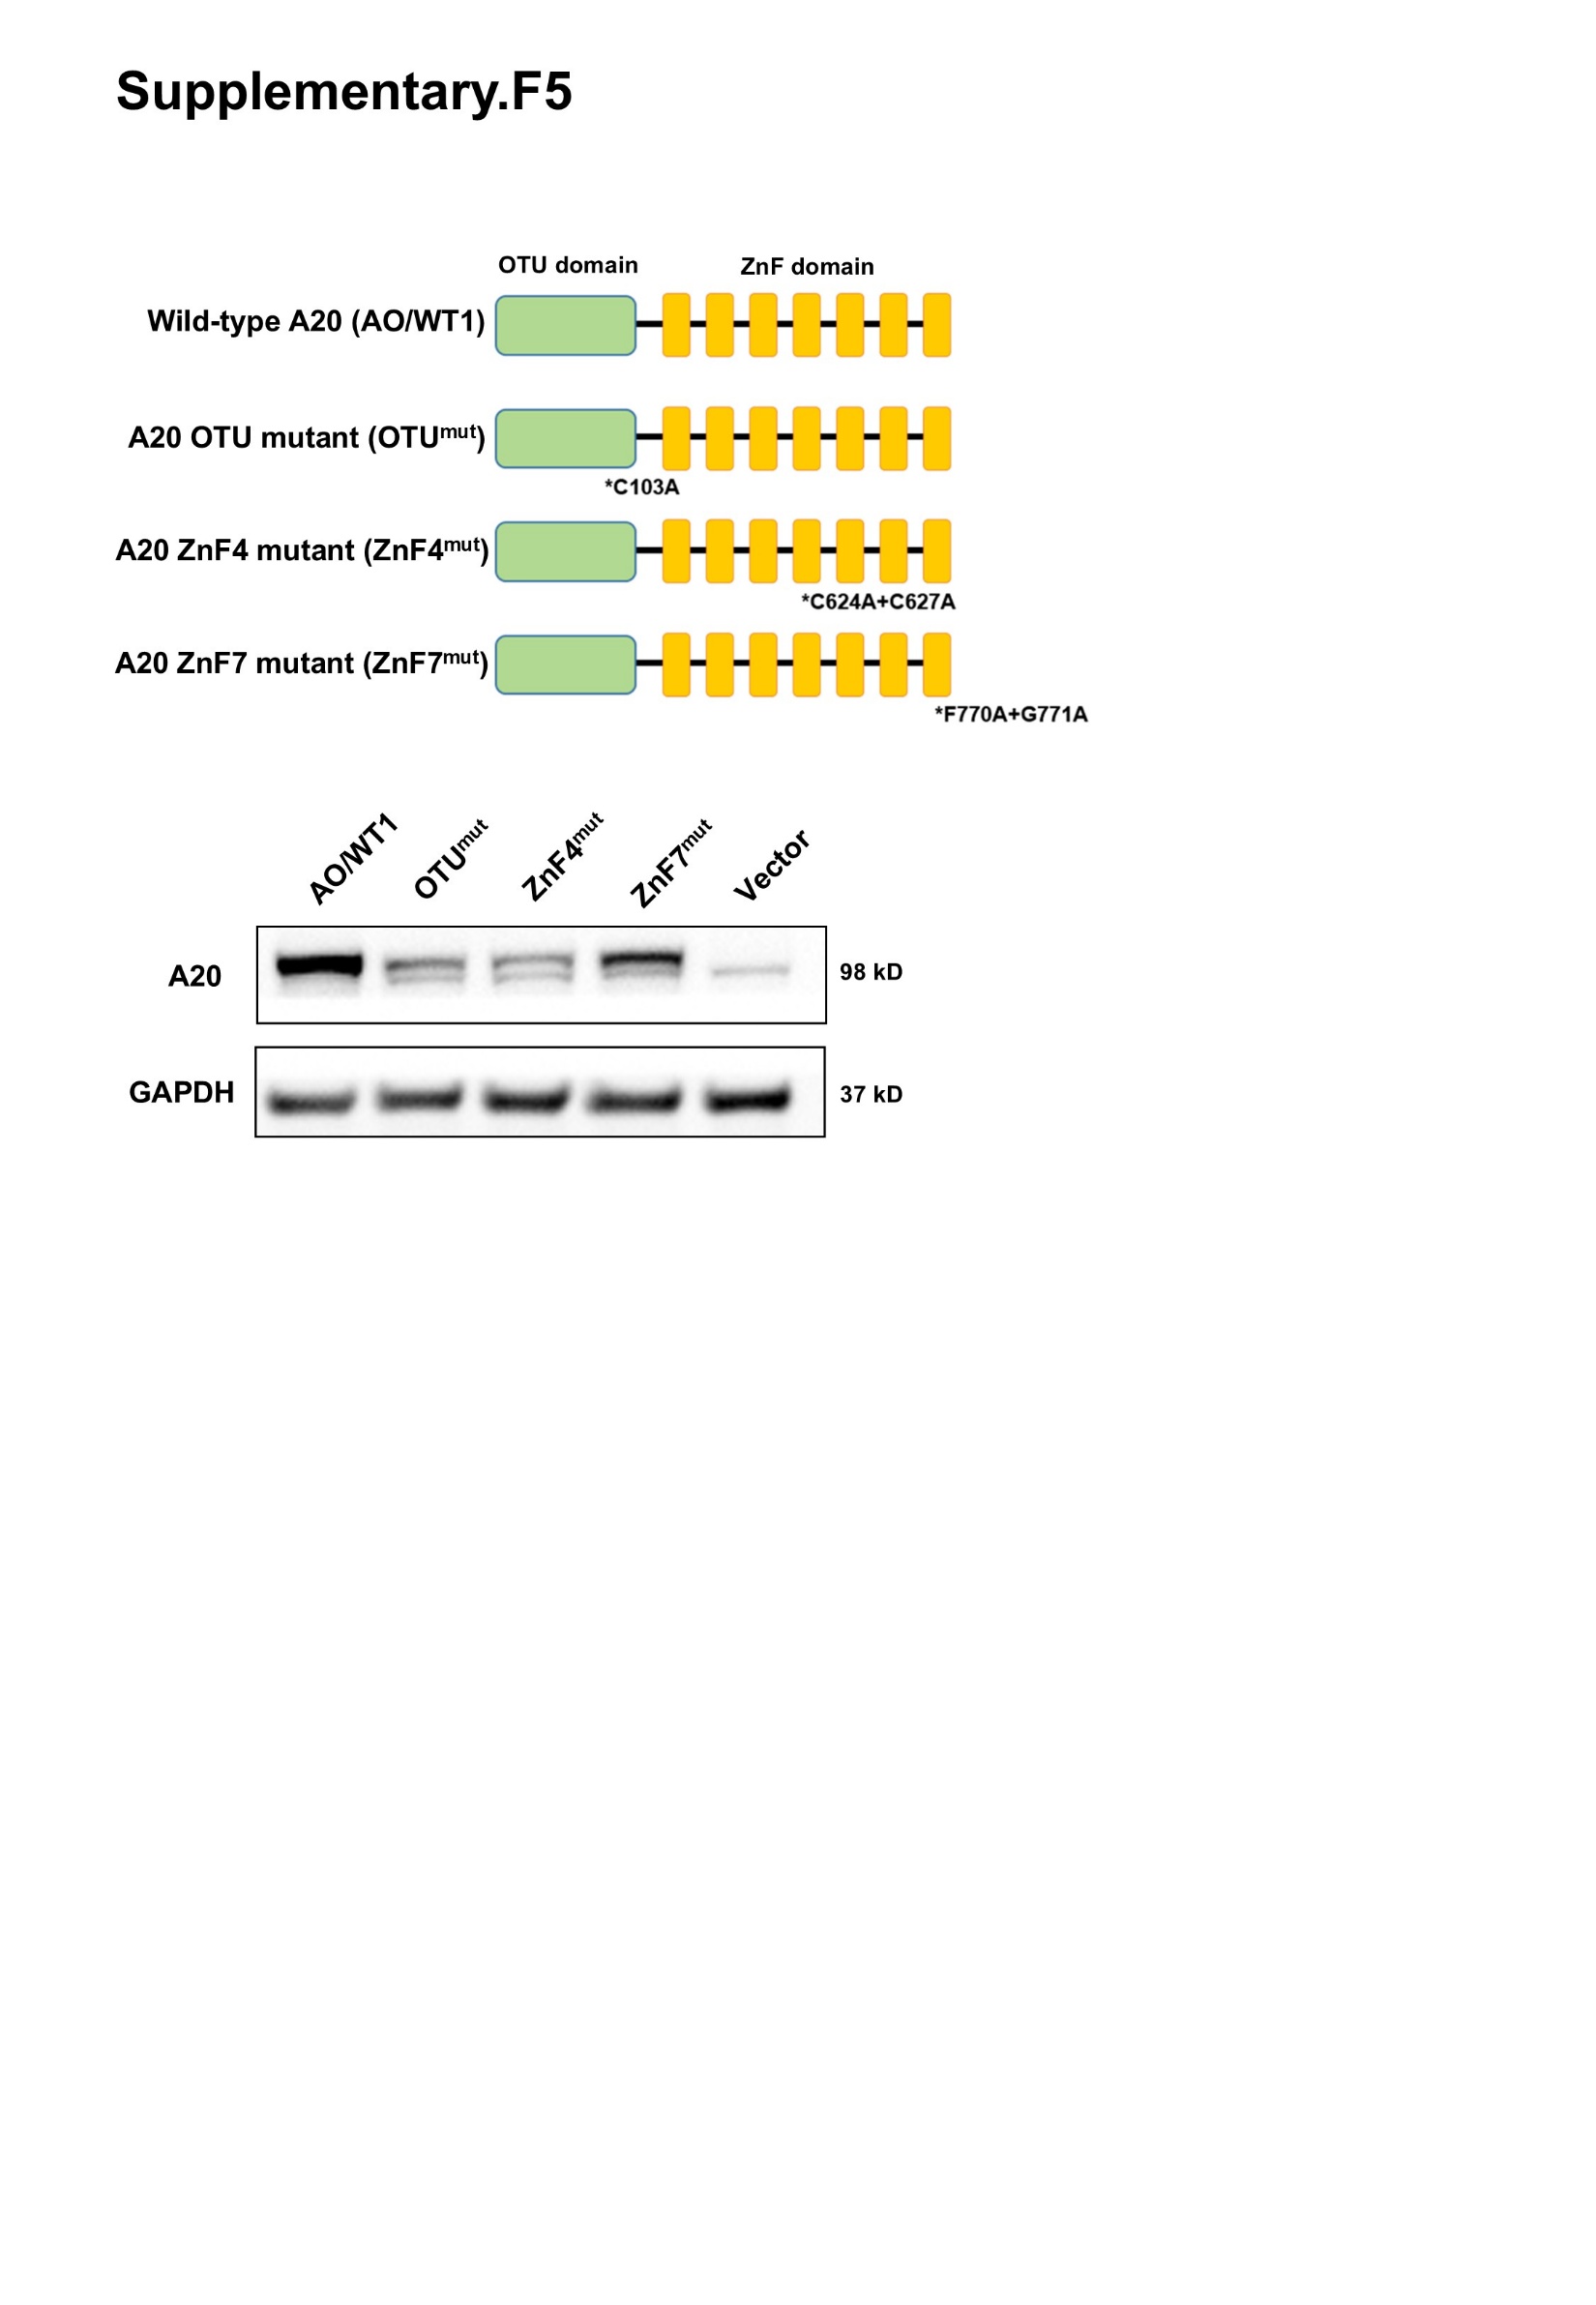

Supplement: Supplementary file 4 [file 26c15abc29ca7c29854cbcf1.docx]

Supplemental Figure 1.


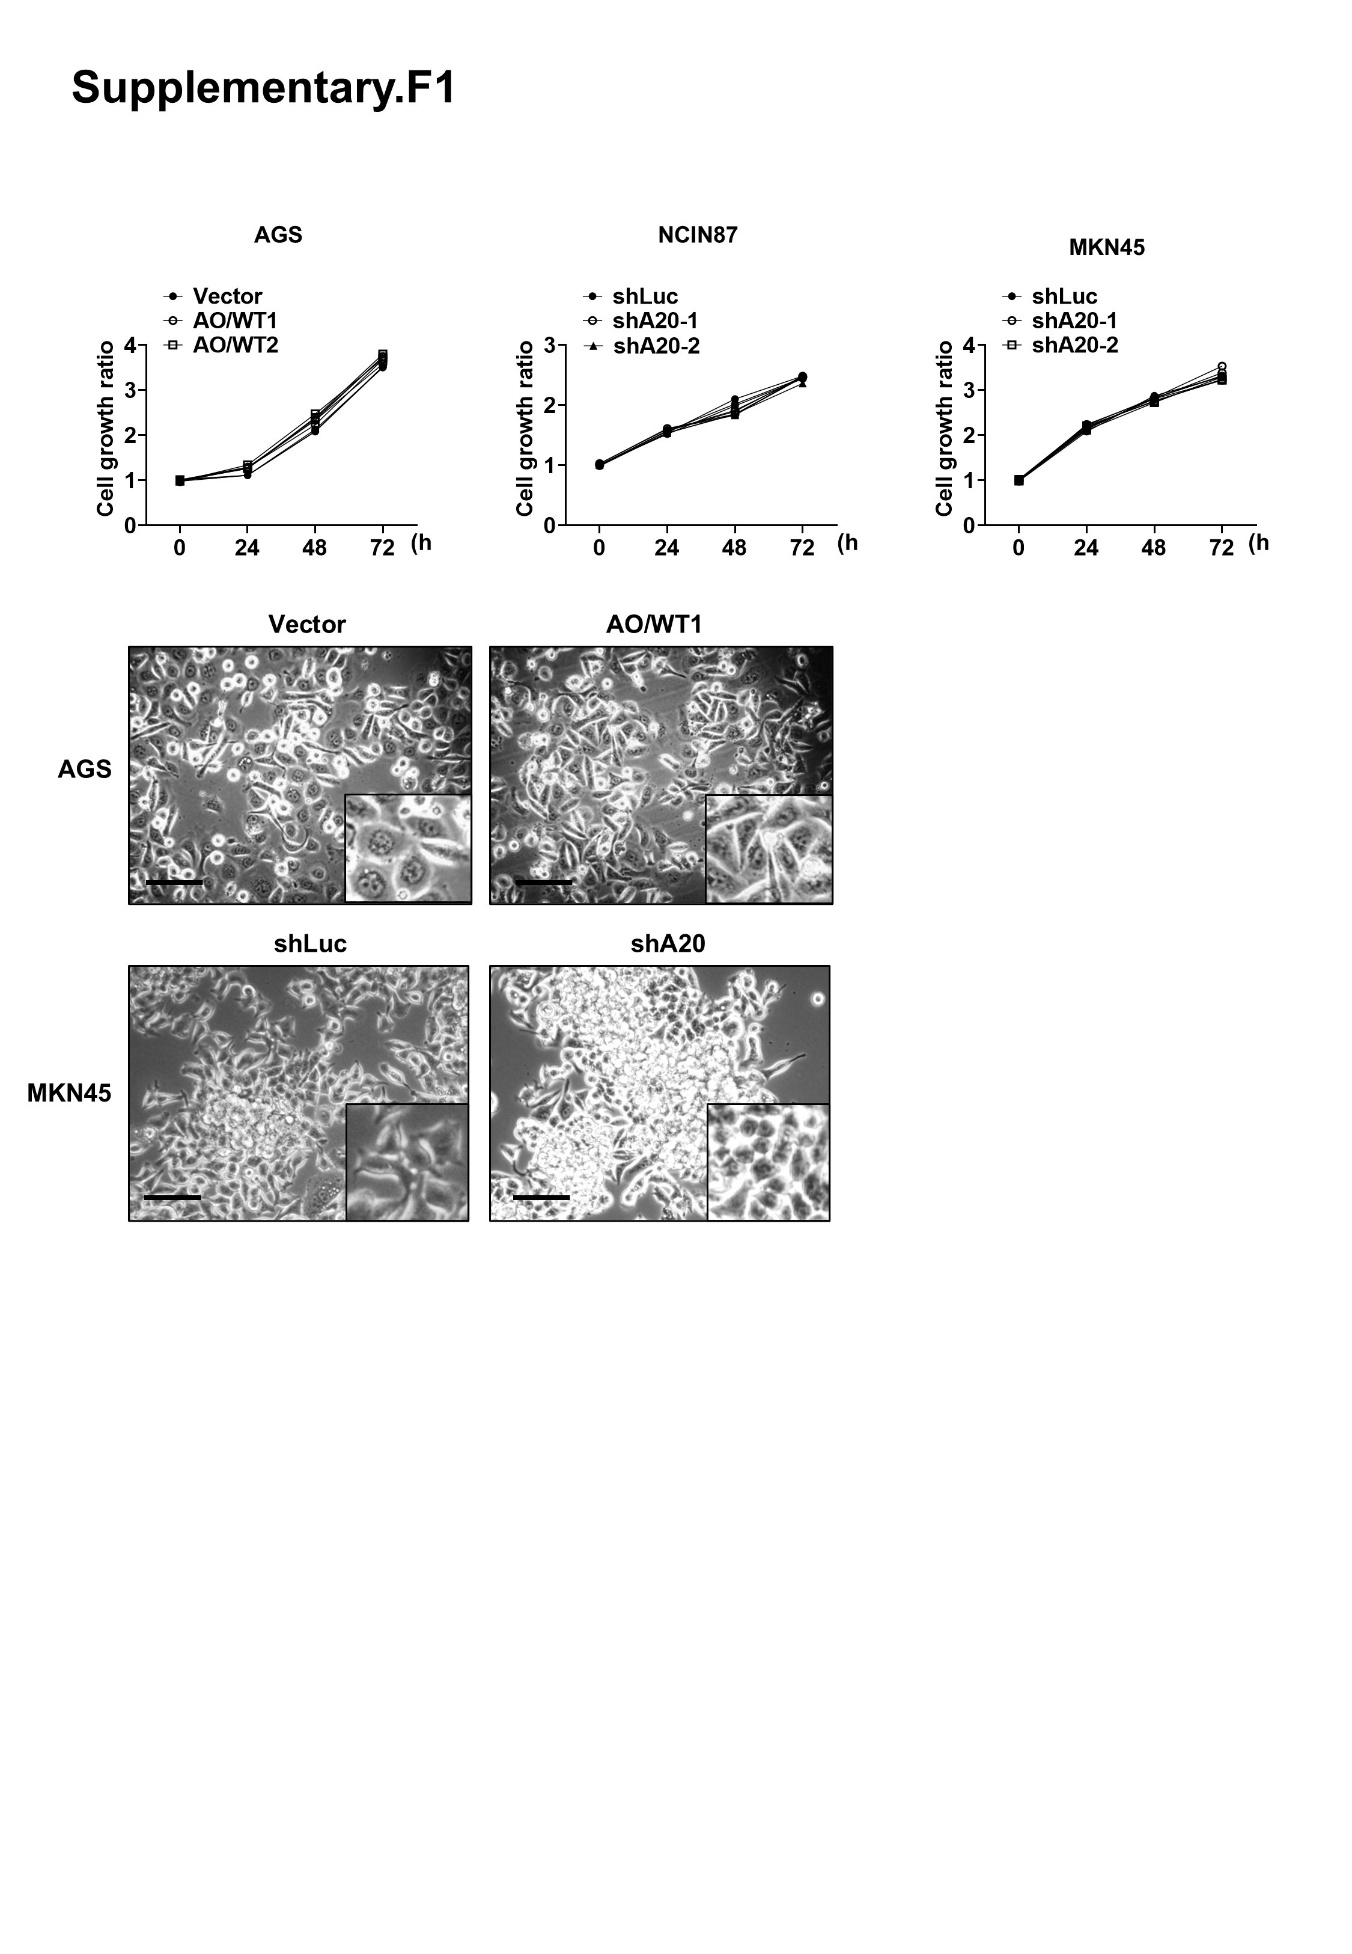

Supplement: Supplementary file 5 [file 348cd1bd2f3881feeeb22e4b.docx]

Supplemental Figure 2.


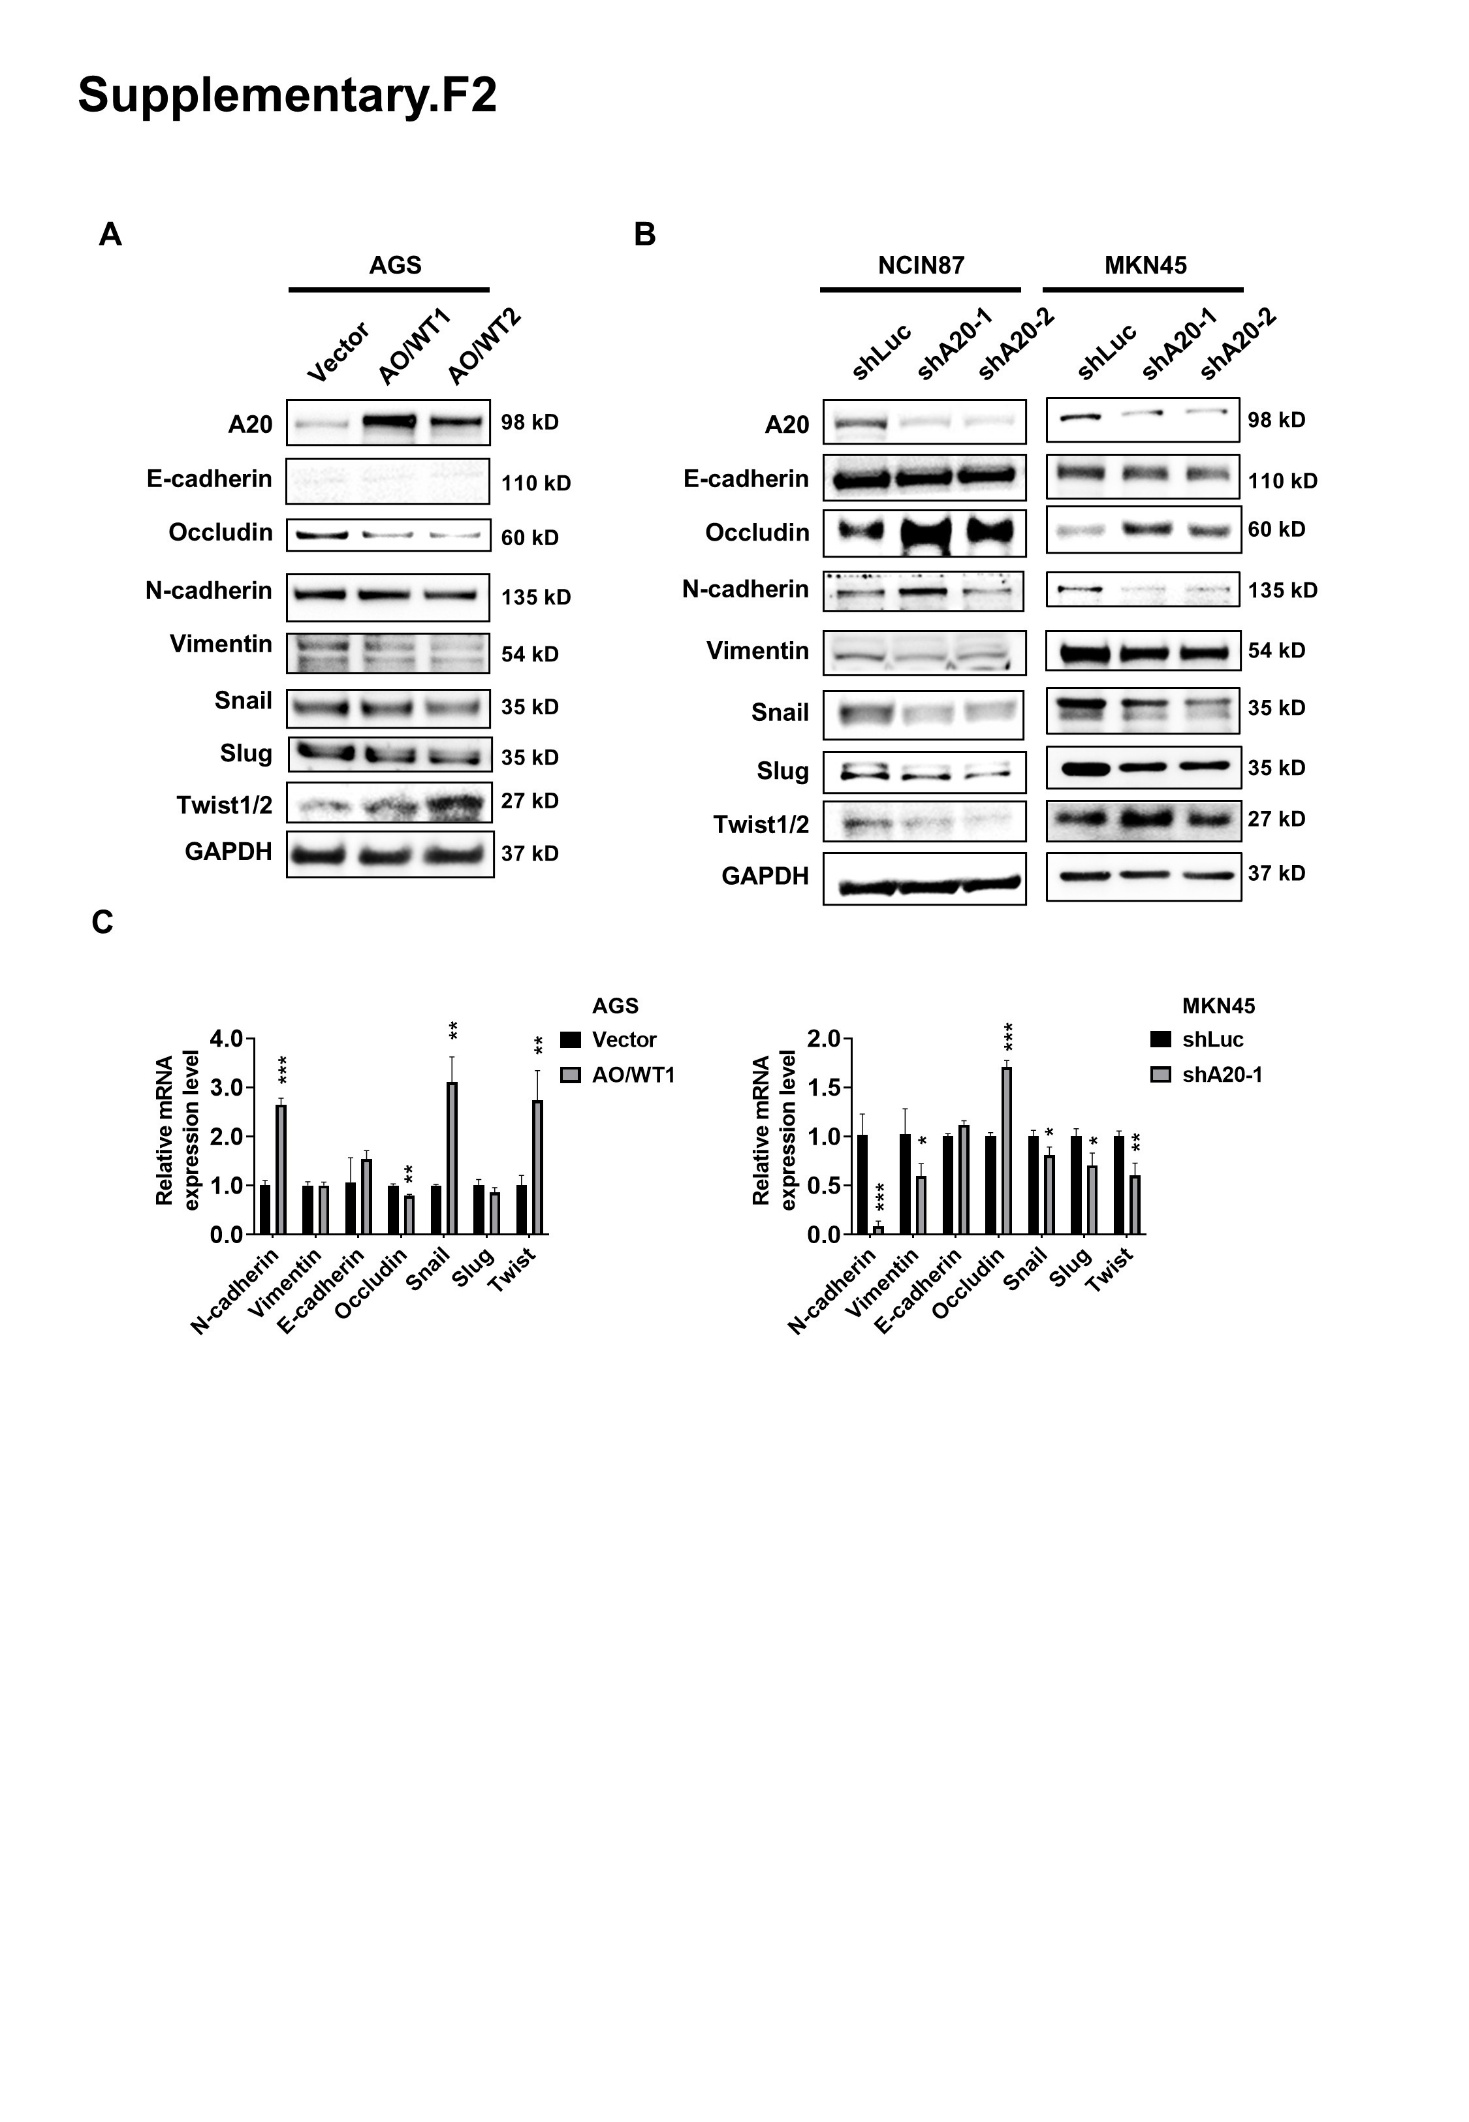

Supplement: Supplementary file 8 [file 806069fc542f7105bd293333.docx]

Supplemental Figure 4.


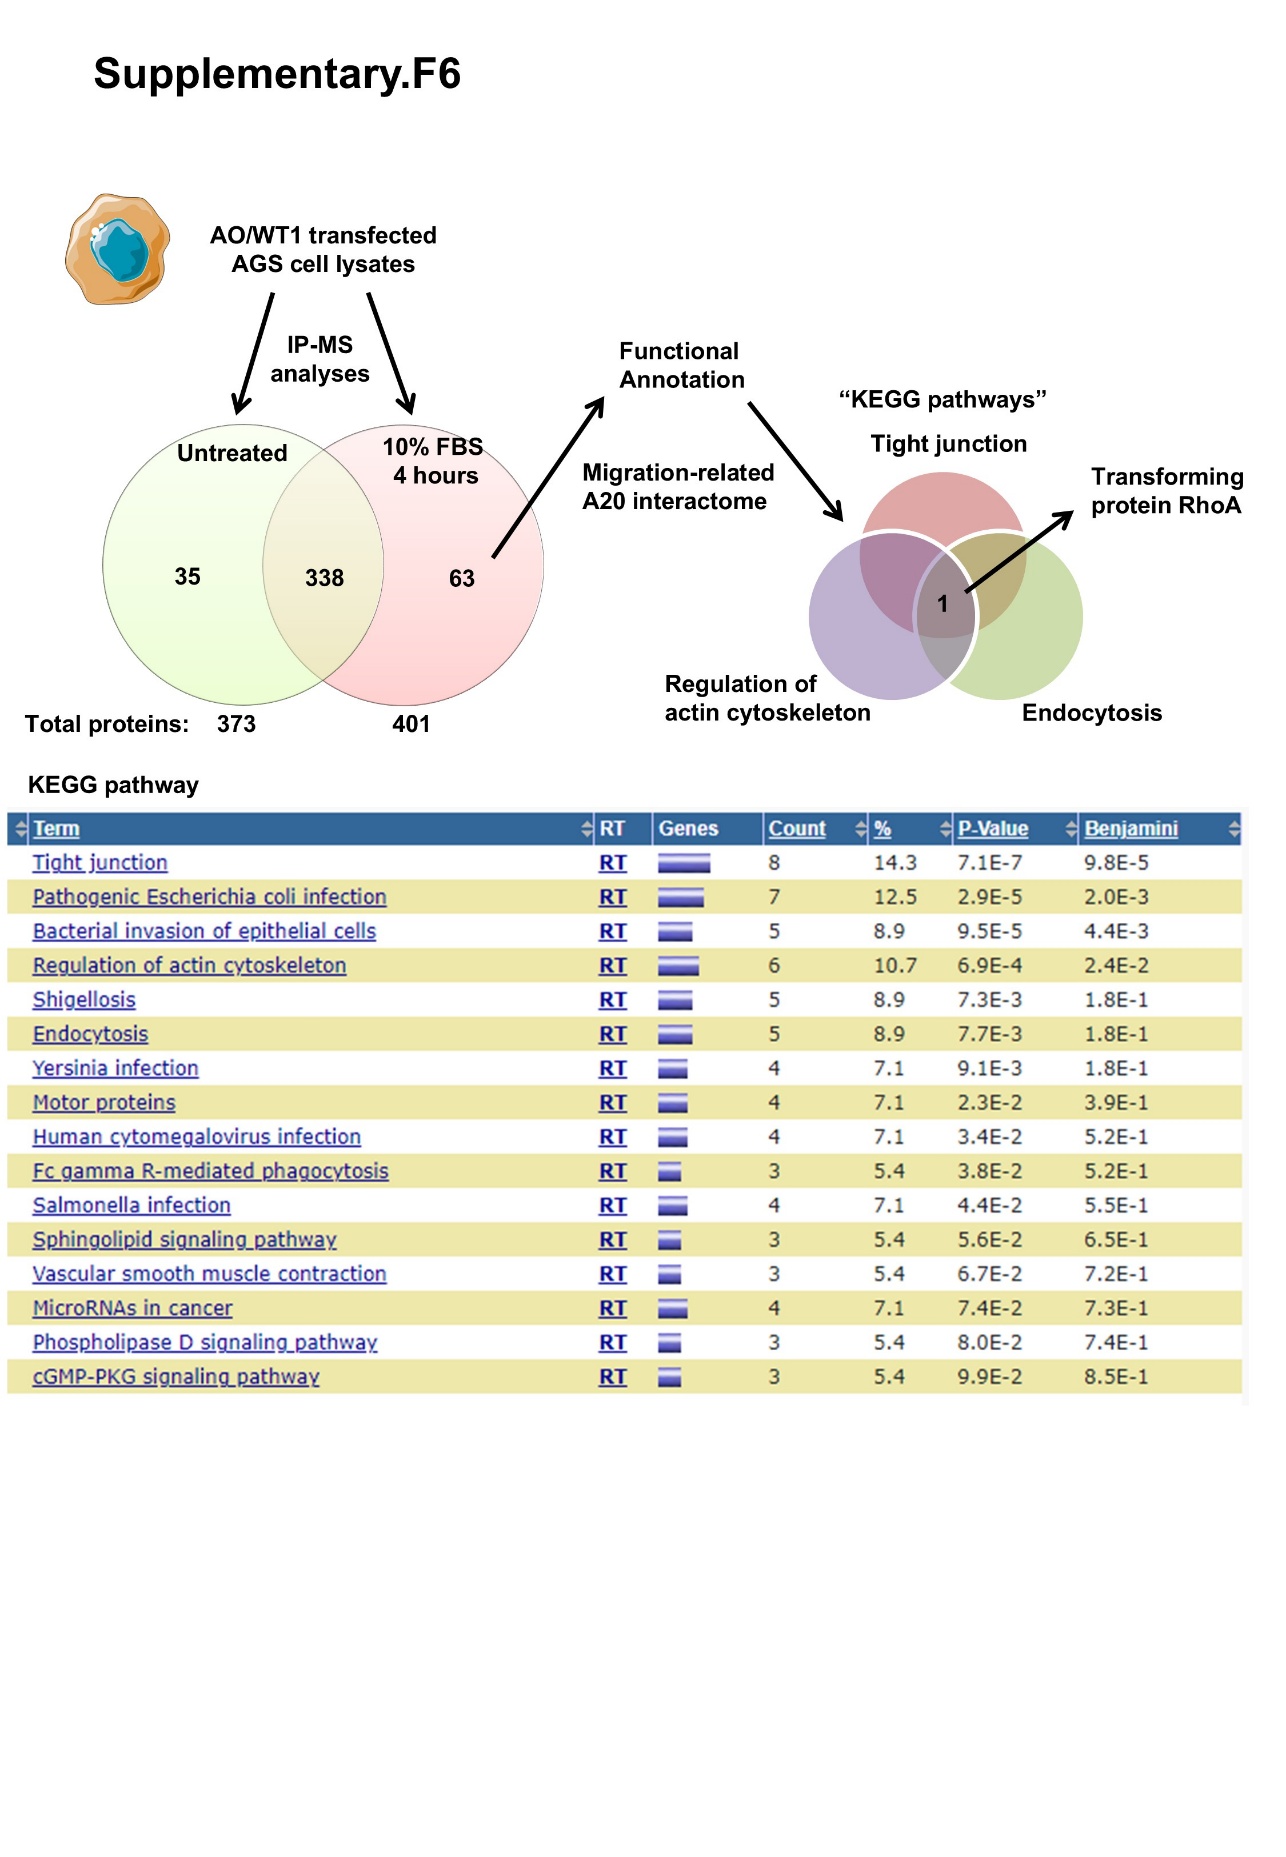

Supplement: Supplementary file 10 [file a6ac2926a859f1860c4ae2f6.docx]

Supplemental Figure 6.


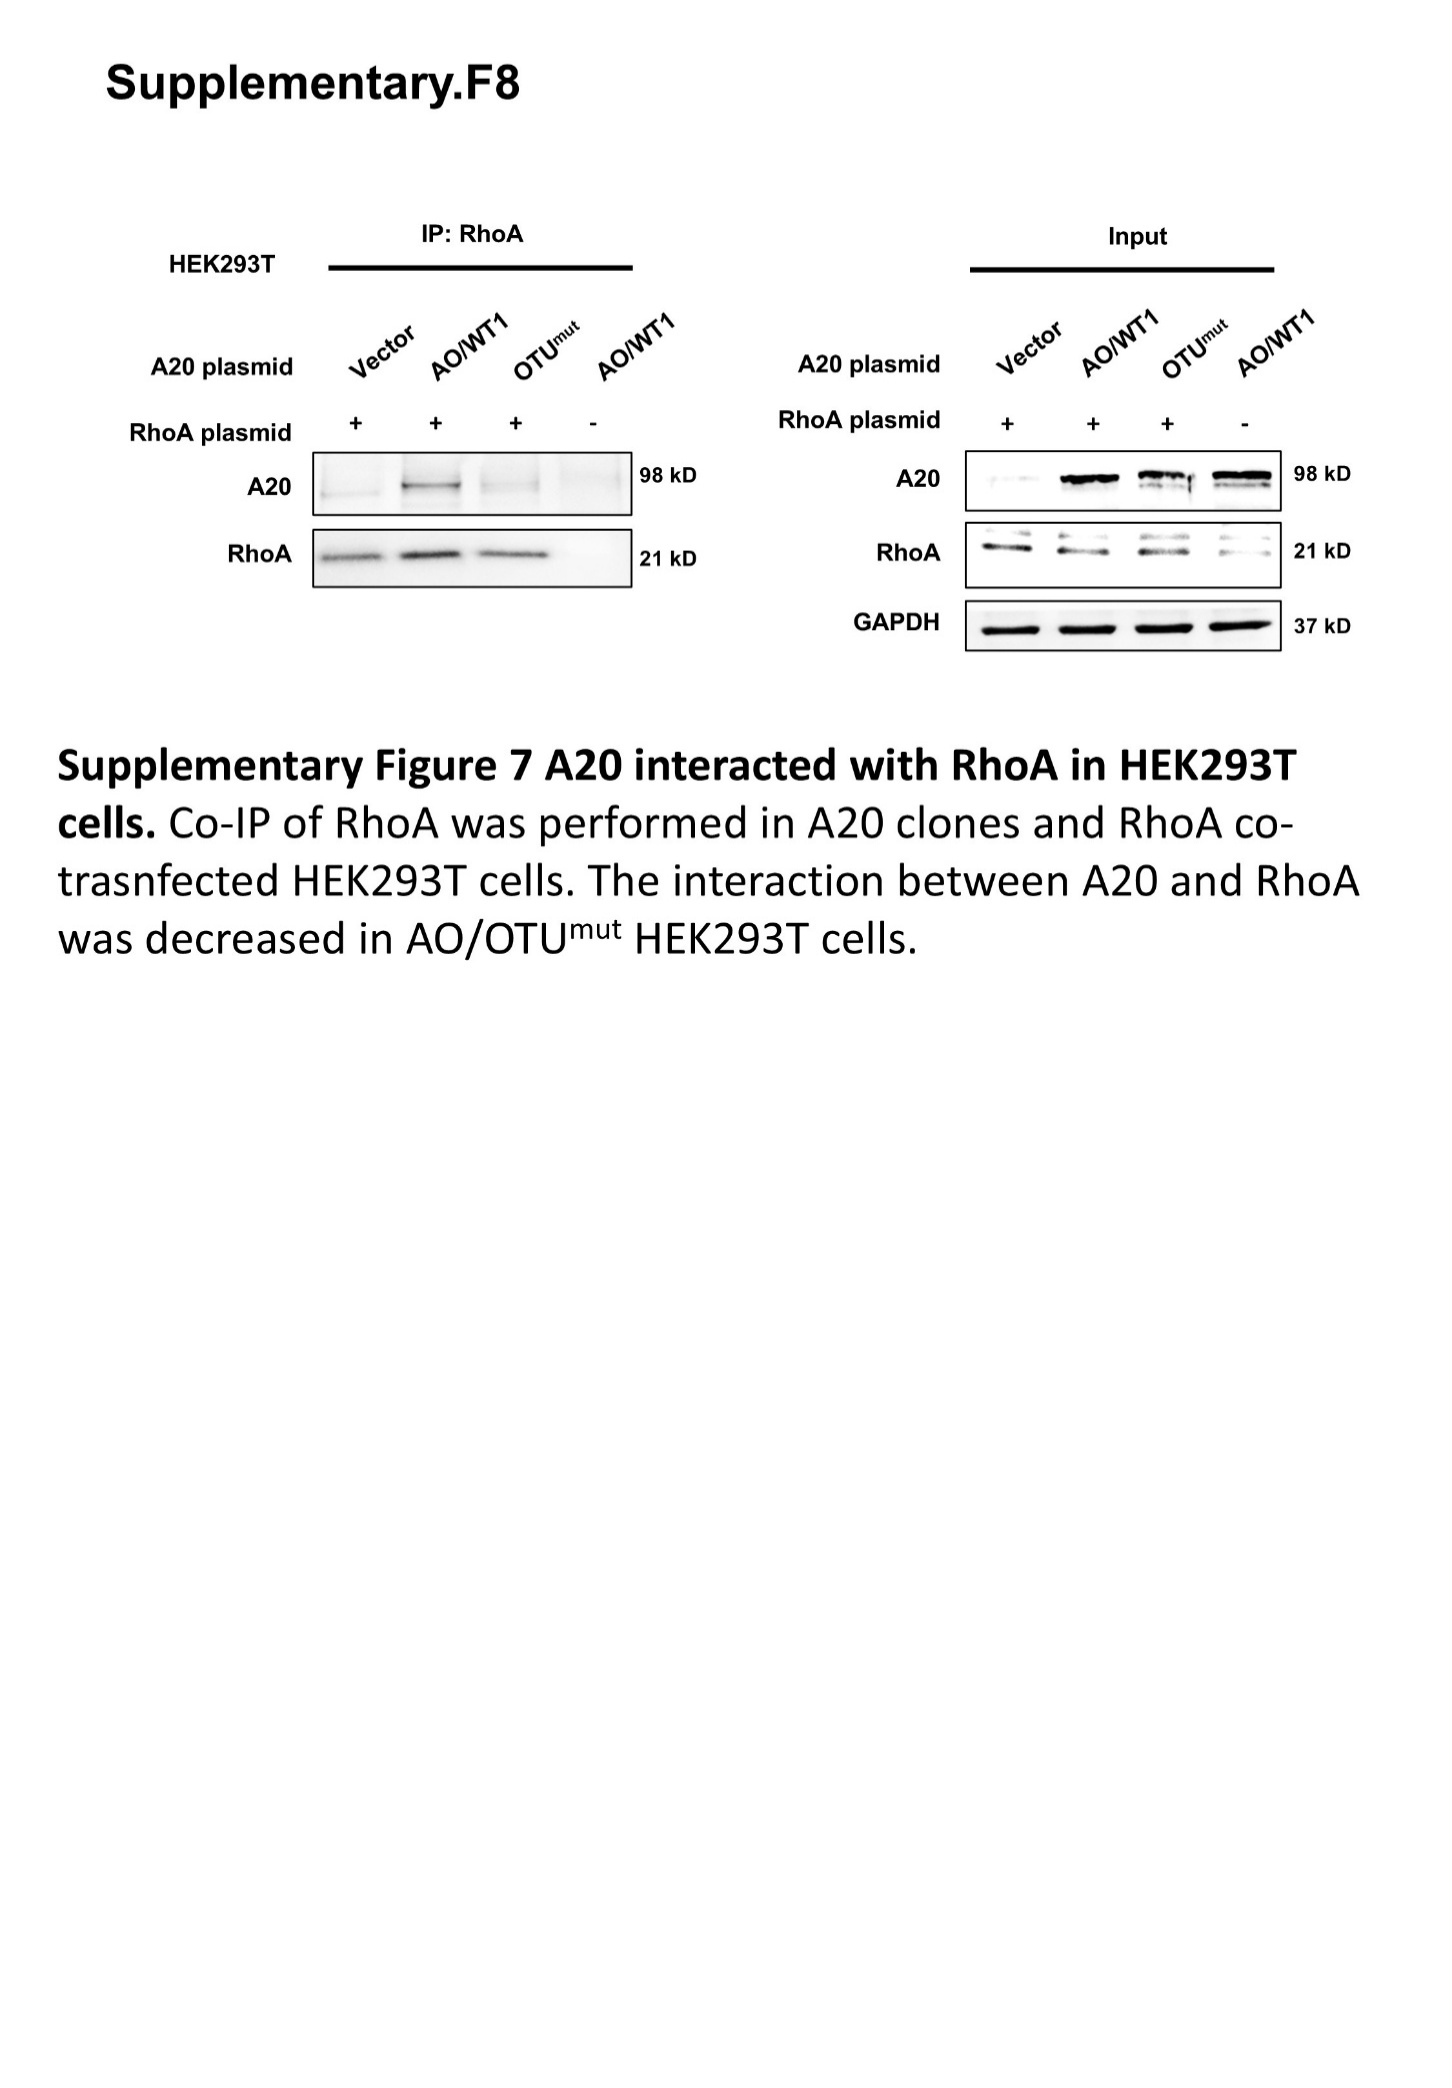

Supplement: Supplementary file 11 [file dd991ac725d366ba6f4a7780.docx]
